# Supplementary material for: Shape-controlled hydrothermal synthesis of ferroelectric Bi4Ti3O12 nanostructures
Source: Royal Society of Chemistry journal article supplement (doi:10.1039/c2ce26330k), 2012-11-30
Supplement: c2ce26330k.pdf [file c2ce26330k.pdf]

## Electronic Supporting Information

### Shape-Controlled Hydrothermal Synthesis and Growth

#### Mechanism of $\text{Bi}_4\text{Ti}_3\text{O}_{12}$ Nanostructure

Fang Wang<sup>a,b</sup>, Jinbin Wang<sup>a,b\*</sup>, Xiangli Zhong<sup>a,b\*</sup>, Bo Li<sup>a,b</sup>, Jun Liu<sup>a,b</sup>, Di Wu<sup>c</sup>,  
Dan Mo<sup>c</sup>, Daoyou Guo<sup>a,b</sup>, Shuoguo Yuan<sup>a,b</sup>, Kedong Zhang<sup>a,b</sup>, Yichun Zhou<sup>a,b</sup>

<sup>a</sup> *Key Laboratory of Low Dimensional Materials and Application Technology of Ministry of Education, Xiangtan University, Hunan Xiangtan 411105, China*

<sup>b</sup> *Faculty of Materials, Optoelectronics and Physics, Xiangtan University, Hunan Xiangtan 411105, China*

<sup>c</sup> *National Laboratory of Solid State Microstructures and Department of Materials Science and Engineering, Nanjing University, Nanjing 210093, China*

---

\*\* Author to whom correspondence should be addressed. Tel: 86-731-58292199, Fax: 86-731-58298119, Electronic mail: [jbwang@xtu.edu.cn](mailto:jbwang@xtu.edu.cn); [xlzhong@xtu.edu.cn](mailto:xlzhong@xtu.edu.cn)

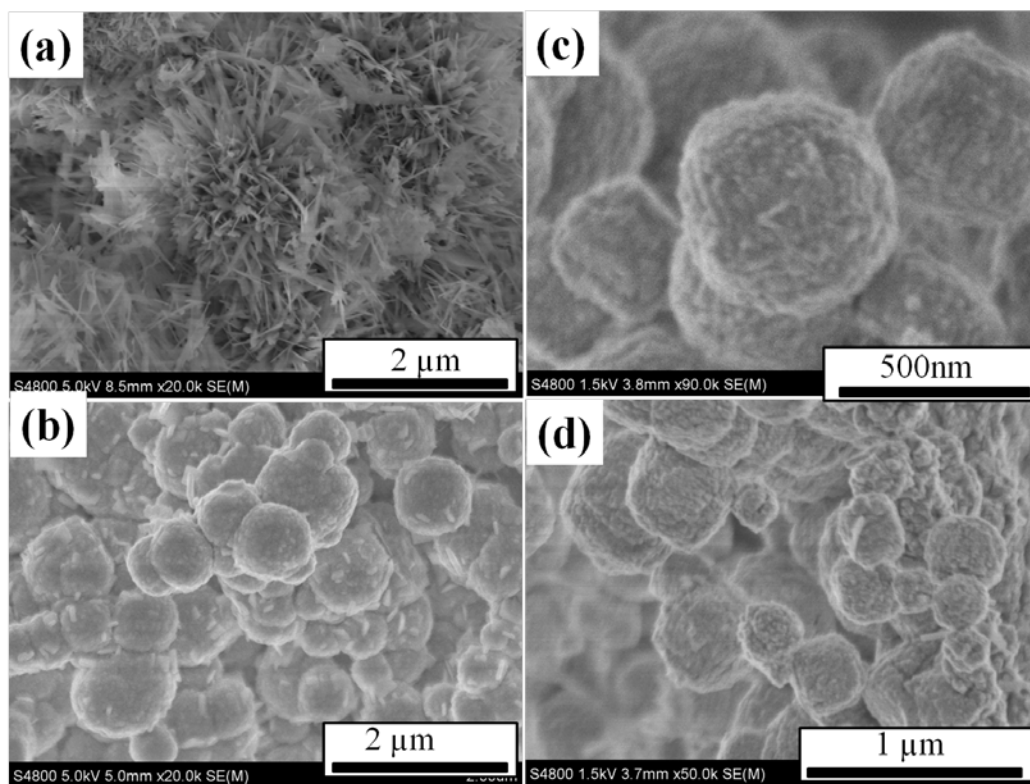

Figure S1. SEM images of the as-synthesized BIT products obtained at 200 °C in the presence of different concentration of mineralizer at 24 h: (a) 1M NaOH, (b) 3M NaOH, (c) 2M KOH, and (d) 3M KOH.

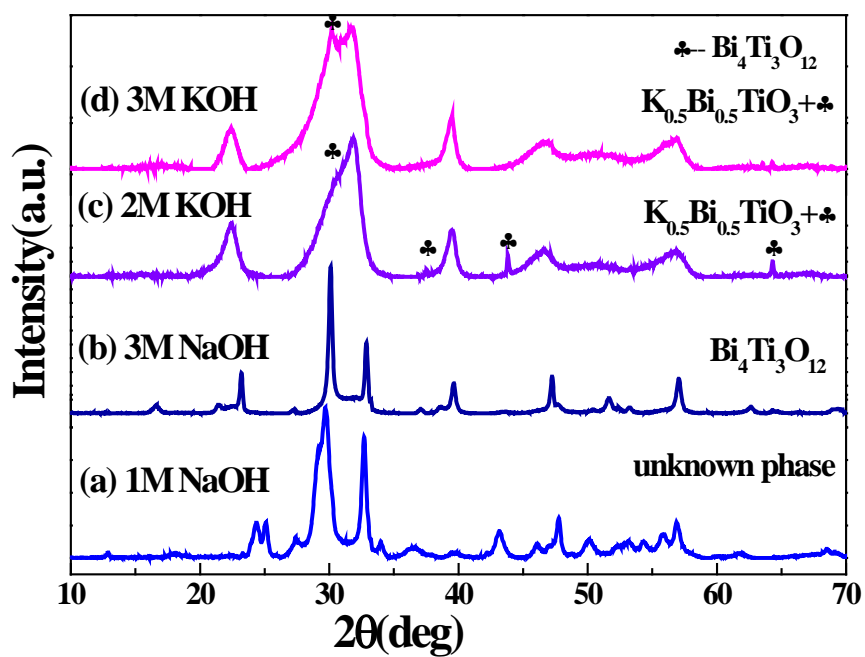

Figure S2. XRD patterns of the as-synthesized BIT products obtained at 200 °C in the presence of different concentration of mineralizer at 24 h: (a) 1M NaOH, (b) 3M NaOH, (c) 2M KOH, and (d) 3M KOH.

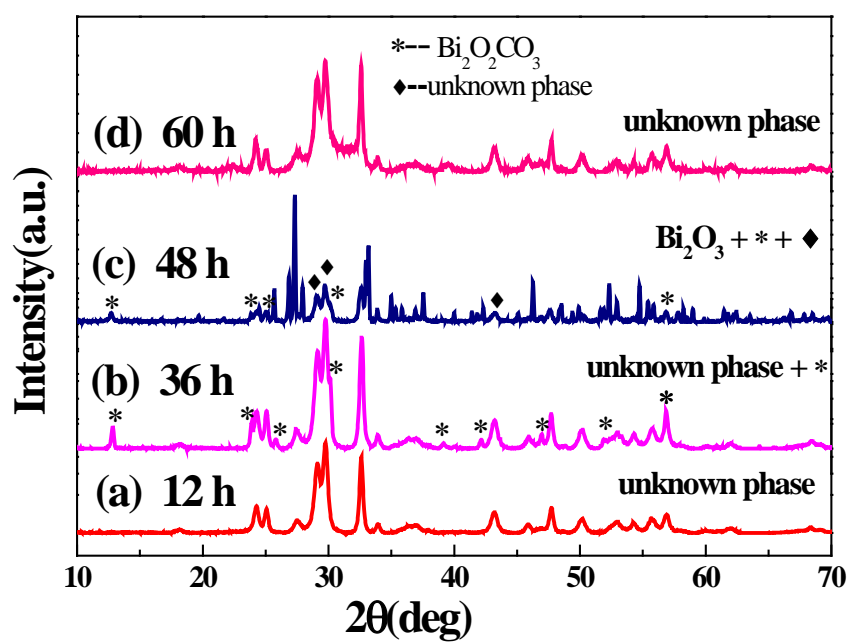

Figure S3. XRD patterns of the as-synthesized BIT products obtained at 200 °C in the presence of 1 M KOH at different reaction time: (a) 0 h, (b) 12h, (c) 36h and (d) 60 h.
